# Supplementary material
Source: PubMed Central journal article supplement (PMC6120196)
Supplement: supp_RA118.003447_137428_2_supp_156015_pxjx03.pdf [file supp_RA118.003447_137428_2_supp_156015_pxjx03.pdf]

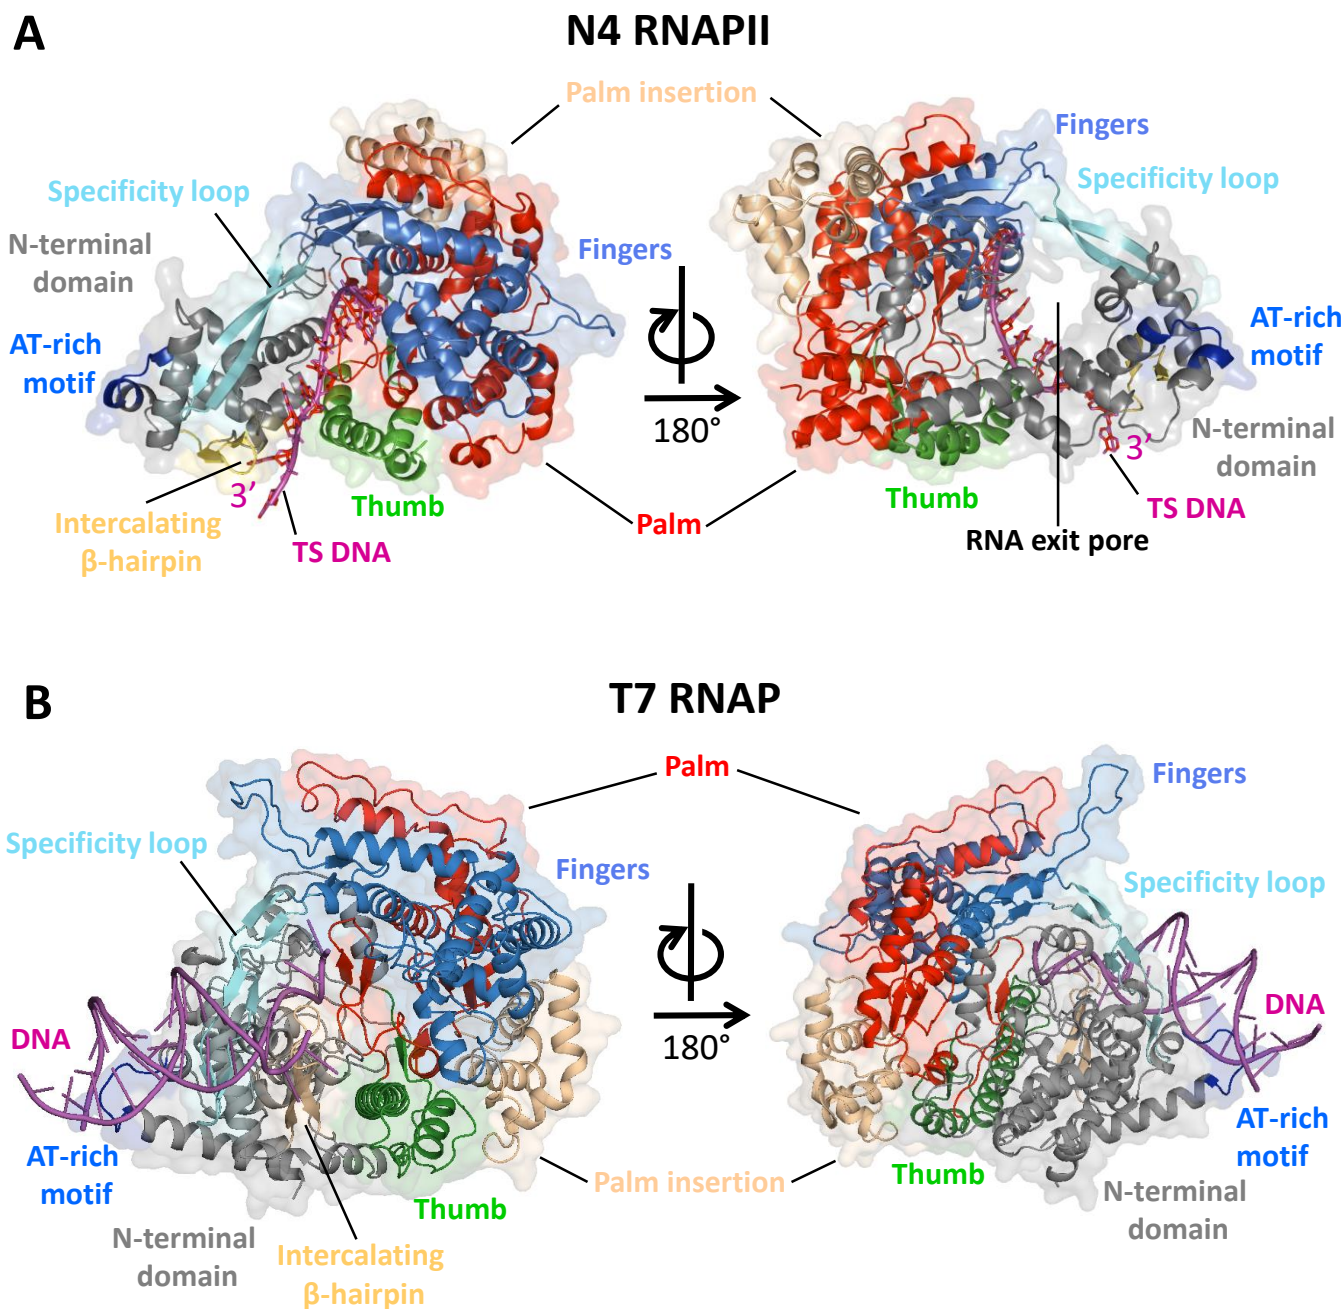

**Figure S2. A comparison of structural organizations of N4 RNAPII and T7 RNAP promoter complexes.** A. Domain organization of N4 RNAPII. Two views of the complex are represented as ribbon models overlaid on surface models with subdomains and structural motifs labeled by different colors. The NTD, Thumb, Palm, Fingers and Palm insertion subdomains are shown in grey, green, red, marine and wheat, correspondingly; DNA is shown in magenta. Structural homologs of RNAPII promoter recognition elements, the specificity loop, intercalating  $\beta$ -hairpin, AT-rich recognition motif are shown in light blue, yellow and blue, correspondingly. Structural analog of the RNA exit pore is shown in the right panel. B. Domain organization of T7 RNAP. The orientation of the enzyme and domain coloring correspond to those of N4 RNAPII in panel A.
