# Supplementary material
Source: PubMed Central journal article supplement (PMC6120196)
Supplement: supp_RA118.003447_137428_2_supp_156017_pgjg07.pdf [file supp_RA118.003447_137428_2_supp_156017_pgjg07.pdf]

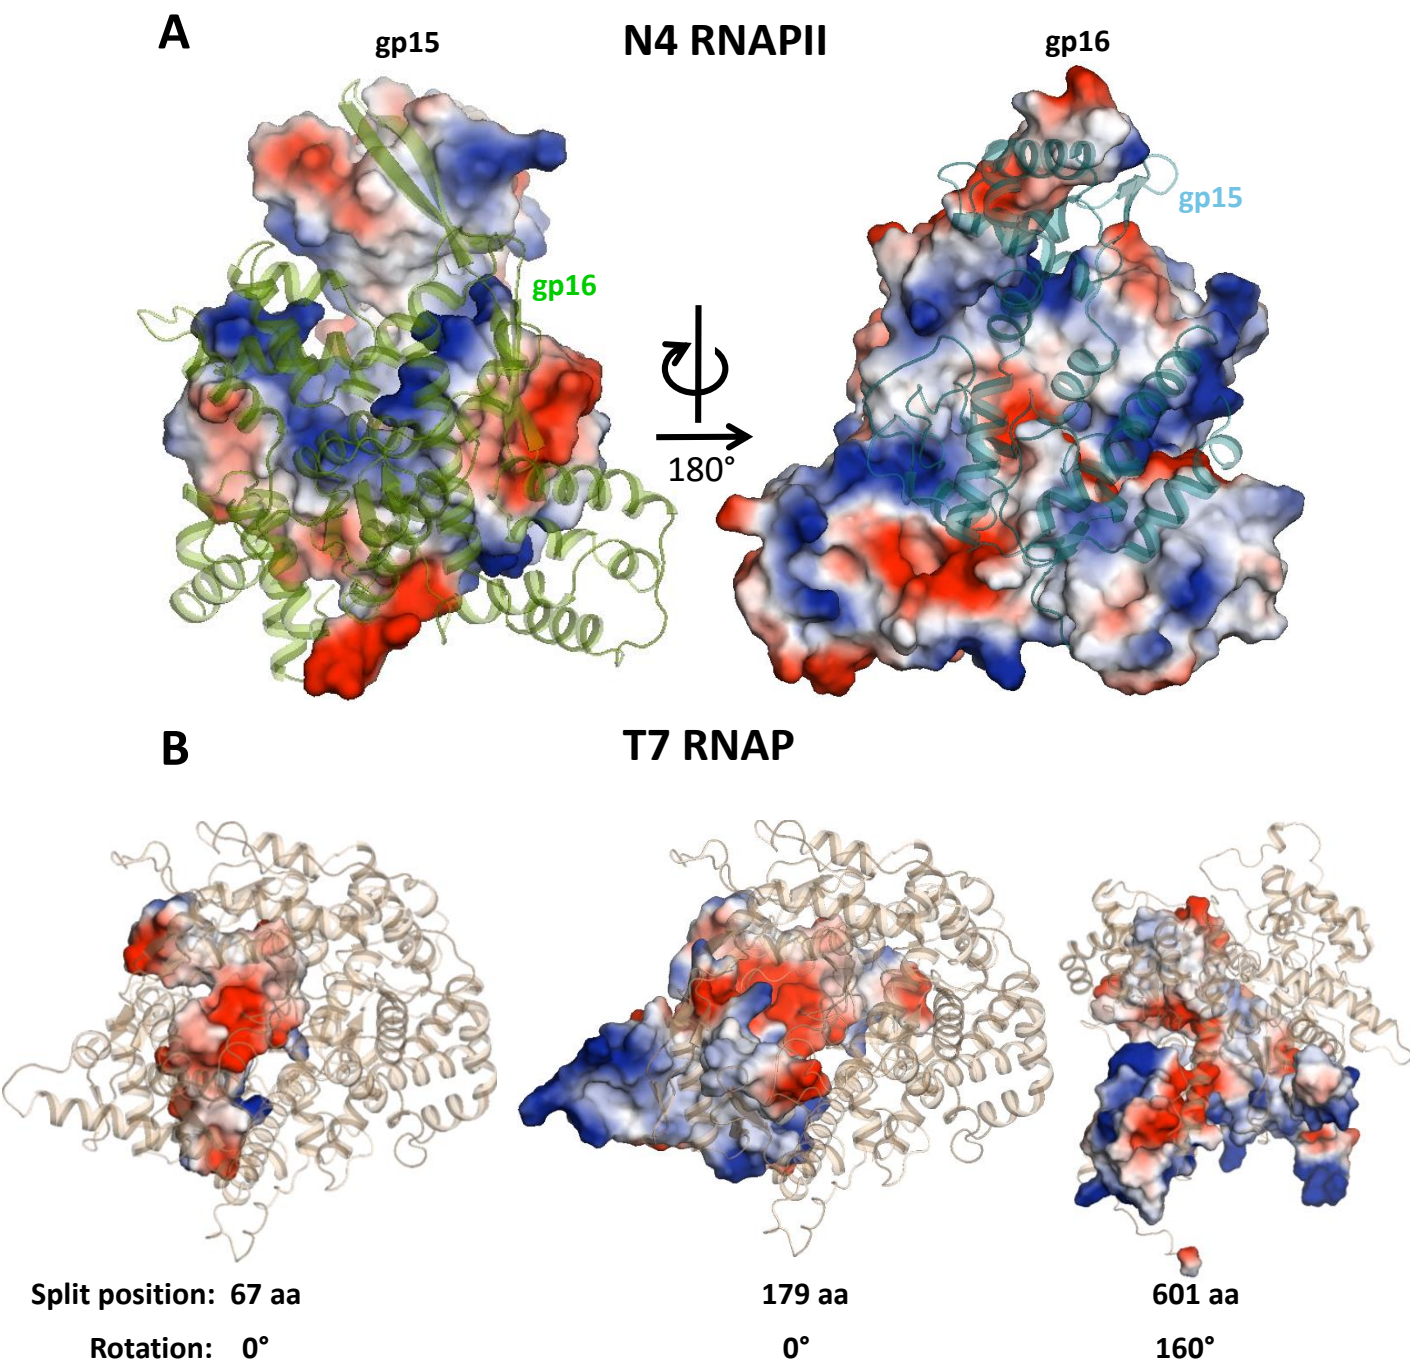

**Figure S3. The dimerization of the N4 RNAPII subunits gp15 and gp16 is based mostly on electrostatic interactions.** A. Distribution of electrostatic potentials on the dimerization surfaces of gp15 (left panel) and gp16 (right panel) subunits. Blue, red, and white colors depict areas with positive, negative and neutral charges, correspondingly. The matching subunits are shown as semi-transparent ribbon models overlaid on top and colored as in **Figure 1**. DNA template was removed for clarity. B. Distribution of electrostatic potentials on the dimerization surfaces of split versions of T7 RNAP (promoter-bound conformation). The split sites and rotation angles are indicated. The matching subunits are shown as semi-transparent ribbon models overlaid on top. Surface charges are colored as in Panel A.
