# Supplementary material
Source: PubMed Central journal article supplement (PMC6120196)
Supplement: supp_RA118.003447_137428_2_supp_156018_p1j108.pdf [file supp_RA118.003447_137428_2_supp_156018_p1j108.pdf]

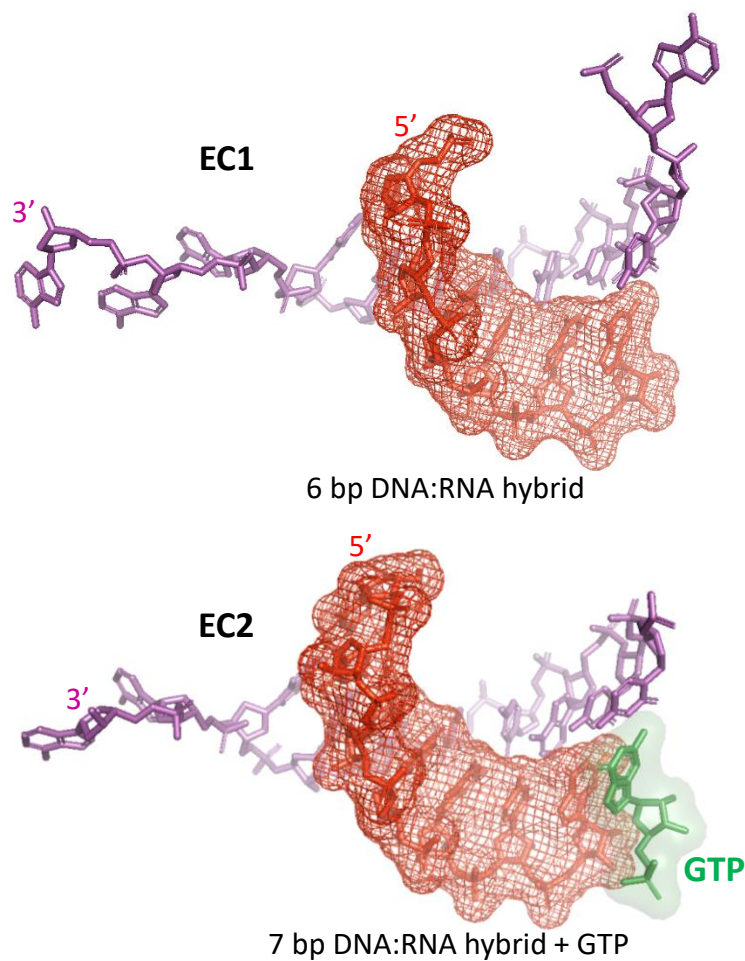

**Figure S4.** Electron density maps of RNA transcripts in elongation complexes of N4 RNAPII. Nucleic acid components of the elongation complexes are shown as stick models colored as in Figure 3A. The electron densities of RNA transcripts are shown as red mesh; the electron density of GTP in the  $i+1$  site is shown in green.
