# Supplementary material
Source: PubMed Central journal article supplement (PMC6120196)
Supplement: supp_RA118.003447_137428_2_supp_156024_pljl0g.pdf [file supp_RA118.003447_137428_2_supp_156024_pljl0g.pdf]

## Table S2 Molodtsov and Murakami

| RNAP      | Transcription factors  | Conformational changes during transcription initiation |
|-----------|------------------------|--------------------------------------------------------|
| N4 RNAPII | N4 gp2, gp1            | None                                                   |
| hmtRNAP   | H. sapiens TFAM, TFB2M | None                                                   |
| N4 vRNAP  | E. coli SSB            | NTD, Fingers, Plug, Motif B                            |
| T7 RNAP   | None                   | NTD, Specificity loop                                  |

**Table S2.** A summary of requirements for promoter binding and occurrence of conformational changes during transcription initiation by N4 RNAPII and 3 other T7-like RNAPs.
