# Supplementary material
Source: PubMed Central journal article supplement (PMC6120196)
Supplement: supp_RA118.003447_137428_2_supp_156070_pcjkj9.pdf [file supp_RA118.003447_137428_2_supp_156070_pcjkj9.pdf]

**Table S1 Molodtsov and Murakami**

| Complex                  | Binary (SeMet)** | Binary***   | EC– RNA12*** | EC – RNA8*** |
|--------------------------|------------------|-------------|--------------|--------------|
| PDB code                 |                  | 6DT7        | 6DT8         | 6DTA         |
| Data collection          |                  |             |              |              |
| Space group              | C2               | I4          | I4           | I4           |
| Cell dimensions          |                  |             |              |              |
| a (Å)                    | 241.270          | 173.321     | 174.76       | 175,049      |
| b (Å)                    | 75.056           | 173.321     | 174.76       | 175,049      |
| c (Å)                    | 170.705          | 76.316      | 76.404       | 76,598       |
| $\beta$ (°)              | 134.66           | 90.0        | 90.0         | 90.0         |
| Resolution (Å)           | 50 – 2.3         | 50 – 2.5    | 50 – 3.2     | 30 – 2.7     |
| Total reflections        | 288,554          | 173,823     | 81,031       | 142,760      |
| Unique reflections       | 94,476           | 39,317      | 19,223       | 31,537       |
| Redundancy               | 3.1 (2.4)        | 4.4 (4.1)   | 4.1 (4.0)    | 4.5 (4.3)    |
| Completeness (%)*        | 97.7 (89.7)      | 99.87 (100) | 99.9 (99.9)  | 97.9 (96.8)  |
| I / $\sigma$ *           | 10.4 (1.1)       | 15.4 (1.4)  | 13.7 (1.4)   | 32.6 (1.7)   |
| R <sub>sym</sub> (%)*    | 9.4 (73.4)       | 7.8 (89.8)  | 10 (88.6)    | 5 (87.1)     |
| CC <sup>1/2</sup> *      |                  | (0.437)     | (0.380)      | (0.594)      |
| Refinement               |                  |             |              |              |
| Resolution (Å)           | 42.6 – 2.35      | 43.3 – 2.5  | 41.1 – 3.2   | 29.9 – 2.7   |
| R <sub>work</sub>        | 0.2092           | 0.1892      | 0.1900       | 0.1909       |
| R <sub>free</sub>        | 0.2277           | 0.2141      | 0.2428       | 0.2226       |
| No. of atoms             | 11,707           | 5,638       | 5,672        | 5,692        |
| R.m.s deviations         |                  |             |              |              |
| Bond length (Å)          | 0.003            | 0.009       | 0.011        | 0.010        |
| Bond angles (°)          | 0.653            | 1.232       | 1.386        | 1.357        |
| Clashscore               | 5.17             | 5.17        | 7.51         | 6.35         |
| Ramachandran favored, %  | 95.97            | 96.68       | 97.8         | 96.91        |
| Ramachandran outliers, % | 0.84             | 0           | 0            | 0            |

**Table S1. Collection of crystallographic data and refinement statistics.**

\*Highest resolution shells are shown in parentheses

\*\*Data set collected at NSLS X29 line, Upton, NY

\*\*\*Data sets collected at MacCHESS F1 line, Ithaca, NY
